# Psychiatric Services

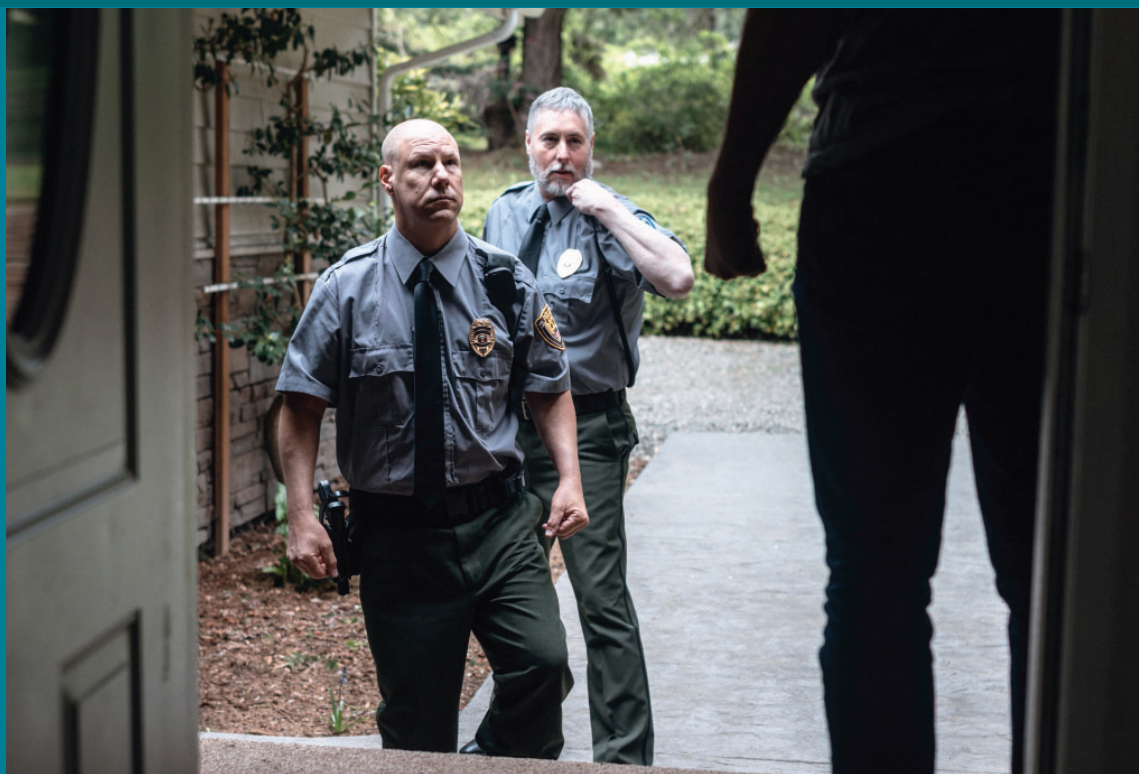

Cops, clinicians, or both? Responding to behavioral health emergencies

Mental health conservatorship for people with serious mental illness

Pharmacotherapy's role in engagement of people with opioid use disorder

Psychiatric leadership in dispositional capacity assessment
